# Supplementary material for: New Insights into Ion Channels: Predicting hERG-Drug Interactions
Source: MDPI journal article supplement (doi:10.3390/ijms231810732), 2022-09-14
Supplement: s1 [file s1]

## Supplementary Materials Section

# New insights into ion channels: Predicting hERG-Drug Interactions

Michael Fitzpatrick Wempe <sup>1,2</sup>

<sup>1</sup> Department of Pharmaceutical Sciences, Skaggs School of Pharmacy and Pharmaceutical Sciences, University of Colorado—Anschutz Medical Campus, Aurora, CO 80045, USA; michael.wempe@cuanschutz.edu; Tel.: +1-303-724-8982

<sup>2</sup> University of Colorado Cancer Center, University of Colorado—Anschutz Medical Campus, Aurora, CO 80045, USA

**Abstract:** Drug-induced long QT syndrome can be a very dangerous side effect of existing and developmental drugs. In this work, a model proposed two decades ago addressing the ion specificity of potassium channels is extended to the human ether-à-gogo gene (hERG). hERG encodes the protein that assembles into the potassium channel responsible for the delayed rectifier current in ventricular cardiac myocytes that is often targeted by drugs associated with QT prolongation. The predictive value of this model can guide a rational drug design decision early in the drug development process and enhance NCE (New Chemical Entity) retention. Small molecule drugs containing a nitrogen that can be protonated to afford a formal +1 charge can interact with hERG to prevent the repolarization of outward rectifier currents. Low-level ab initio calculations are employed to generate electronic features of the drug molecules that are known to interact with hERG. These calculations were employed to generate structure–activity relationships (SAR) that predict whether a small molecule drug containing a protonated nitrogen has the potential to interact with and inhibit the activity of the hERG potassium channels of the heart. The model of the mechanism underlying the ion specificity of potassium channels offers predictive value toward optimizing drug design and, therefore, minimizes the effort and expense invested in compounds with the potential for life-threatening inhibitory activity of the hERG potassium channel.

**Keywords:** potassium channel; human ether-à-gogo-related gene (hERG); structure–activity relationships (SAR); ab initio calculations; drug development; long QT syndrome; *Torsades de Pointes*

---

**Table S1** G98W HF/321G and Chem3D property server data

|           |                                   | ---- CONNOLLY ---- |                    |                    |                    |          |        |
|-----------|-----------------------------------|--------------------|--------------------|--------------------|--------------------|----------|--------|
|           |                                   | (amu)              | (°A <sup>2</sup> ) | (°A <sup>2</sup> ) | (°A <sup>3</sup> ) | Electron | Radius |
| Ion       |                                   | MW                 | AA                 | MA                 | SEV                | Density  | (°A)   |
| Lithium   | Li <sup>+</sup>                   | 6.94               | 70.64              | 11.85              | 3.84               | 1.97     | 0.60   |
| Magnesium | Mg <sup>+2</sup>                  | 24.31              | 81.97              | 16.74              | 6.44               | 10.04    | 0.65   |
| Calcium   | Ca <sup>+2</sup>                  | 40.08              | 89.85              | 20.40              | 8.66               | 19.87    | 0.99   |
| Sodium    | Na <sup>+</sup>                   | 22.99              | 90.73              | 20.82              | 8.93               | 10.15    | 0.95   |
| Water     | H <sub>2</sub> O                  | 18.02              | 96.91              | 23.48              | 10.40              | -----    | -----  |
| Potassium | K <sup>+</sup>                    | 39.10              | 112.50             | 31.85              | 16.90              | 19.64    | 1.33   |
| Rubidium  | Rb <sup>+</sup>                   | 85.47              | 118.75             | 35.21              | 19.65              | 43.82    | 1.48   |
|           | H <sub>2</sub> O·Na <sup>+</sup>  | 41.01              | 131.77             | 39.27              | 19.59              | 10.22    | -----  |
|           | 3H <sub>2</sub> O·Li <sup>+</sup> | 60.99              | 195.25             | 69.76              | 37.89              | 2.12     | -----  |

AA = Accessible Area; MA = Molecular Area; SEV = Solvent-Excluded Volume

Atomic Charge from G98W Output, other data obtained from the Chem3D Property server

**Table S2** Protonated Amines, pKa, MW, atomic charges on amine and CLogP

| Amine                                             | pK <sub>a</sub> | MW     | CMA    | Mulliken | Mulliken | NBO     | MKS     | ClogP  |
|---------------------------------------------------|-----------------|--------|--------|----------|----------|---------|---------|--------|
|                                                   |                 |        |        | AM1      | HF/321G  | HF/321G | HF/321G |        |
| Bu <sub>2</sub> NH <sub>2</sub> <sup>+</sup>      | 11.25           | 130.25 | 189.49 | -0.2332  | -0.8184  | -0.6949 | -0.1290 | 3.306  |
| Piperidine-NH <sub>2</sub> <sup>+</sup>           | 11.12           | 86.16  | 113.95 | -0.2339  | -0.8038  | -0.7056 | -0.4082 | 1.389  |
| Et <sub>2</sub> NH <sub>2</sub> <sup>+</sup>      | 10.94           | 74.15  | 115.36 | -0.2374  | -0.8034  | -0.7029 | -0.5221 | 1.190  |
| EtNH <sub>3</sub> <sup>+</sup>                    | 10.75           | 46.09  | 73.33  | -0.2932  | -0.8339  | -0.8620 | -0.6202 | -0.095 |
| Et <sub>3</sub> NH <sup>+</sup>                   | 10.75           | 102.20 | 147.36 | -0.1805  | -0.7875  | -0.5555 | -0.3476 | 1.605  |
| Me <sub>2</sub> NH <sub>2</sub> <sup>+</sup>      | 10.73           | 46.09  | 76.66  | -0.2331  | -0.8160  | -0.7126 | -0.1385 | 0.132  |
| MeNH <sub>3</sub> <sup>+</sup>                    | 10.64           | 32.07  | 52.68  | -0.2888  | -0.8428  | -0.8673 | -0.3688 | -0.624 |
| Bu <sub>3</sub> NH <sup>+</sup>                   | 9.93            | 186.36 | 258.90 | -0.1743  | -0.8101  | -0.5454 | 0.6550  | 4.779  |
| Me <sub>3</sub> NH <sup>+</sup>                   | 9.79            | 60.12  | 96.86  | -0.1788  | -0.7986  | -0.5666 | 0.0430  | 0.018  |
| Benzyl-NH <sub>3</sub> <sup>+</sup>               | 9.35            | 108.16 | 136.37 | -0.2929  | -0.8220  | -0.8576 | -0.4203 | 1.144  |
| NH <sub>4</sub> <sup>+</sup>                      | 9.26            | 18.04  | 25.79  | -0.3460  | -0.8805  | -1.0300 | -0.8721 | 0.330  |
| Phenyl-NEt <sub>2</sub> H <sup>+</sup>            | 6.65            | 150.25 | 183.35 | -0.1236  | -0.8739  | -0.5438 | -0.4171 | 3.365  |
| Phenyl-NMe <sub>2</sub> H <sup>+</sup>            | 5.80            | 122.19 | 149.44 | -0.1207  | -0.8819  | -0.5475 | -0.3234 | 2.307  |
| Pyridinium ion                                    | 5.29            | 80.11  | 99.13  | -0.2537  | -0.8928  | -0.5738 | -0.2407 | 0.645  |
| Phenyl-NH <sub>3</sub> <sup>+</sup>               | 4.63            | 94.14  | 107.68 | -0.2281  | -0.9282  | -0.8447 | -0.9501 | 0.811  |
| Phenyl <sub>2</sub> -NH <sub>2</sub> <sup>+</sup> | 1.00            | 170.25 | 184.02 | -0.1887  | -0.9798  | -0.6744 | -0.9532 | 3.186  |
| Phenyl <sub>3</sub> -NH <sup>+</sup>              | -5.00           | 246.33 | 251.17 | -0.0148  | -1.0495  | -0.5158 | -1.0794 | 5.735  |

**Figure S1** hERG model test compounds

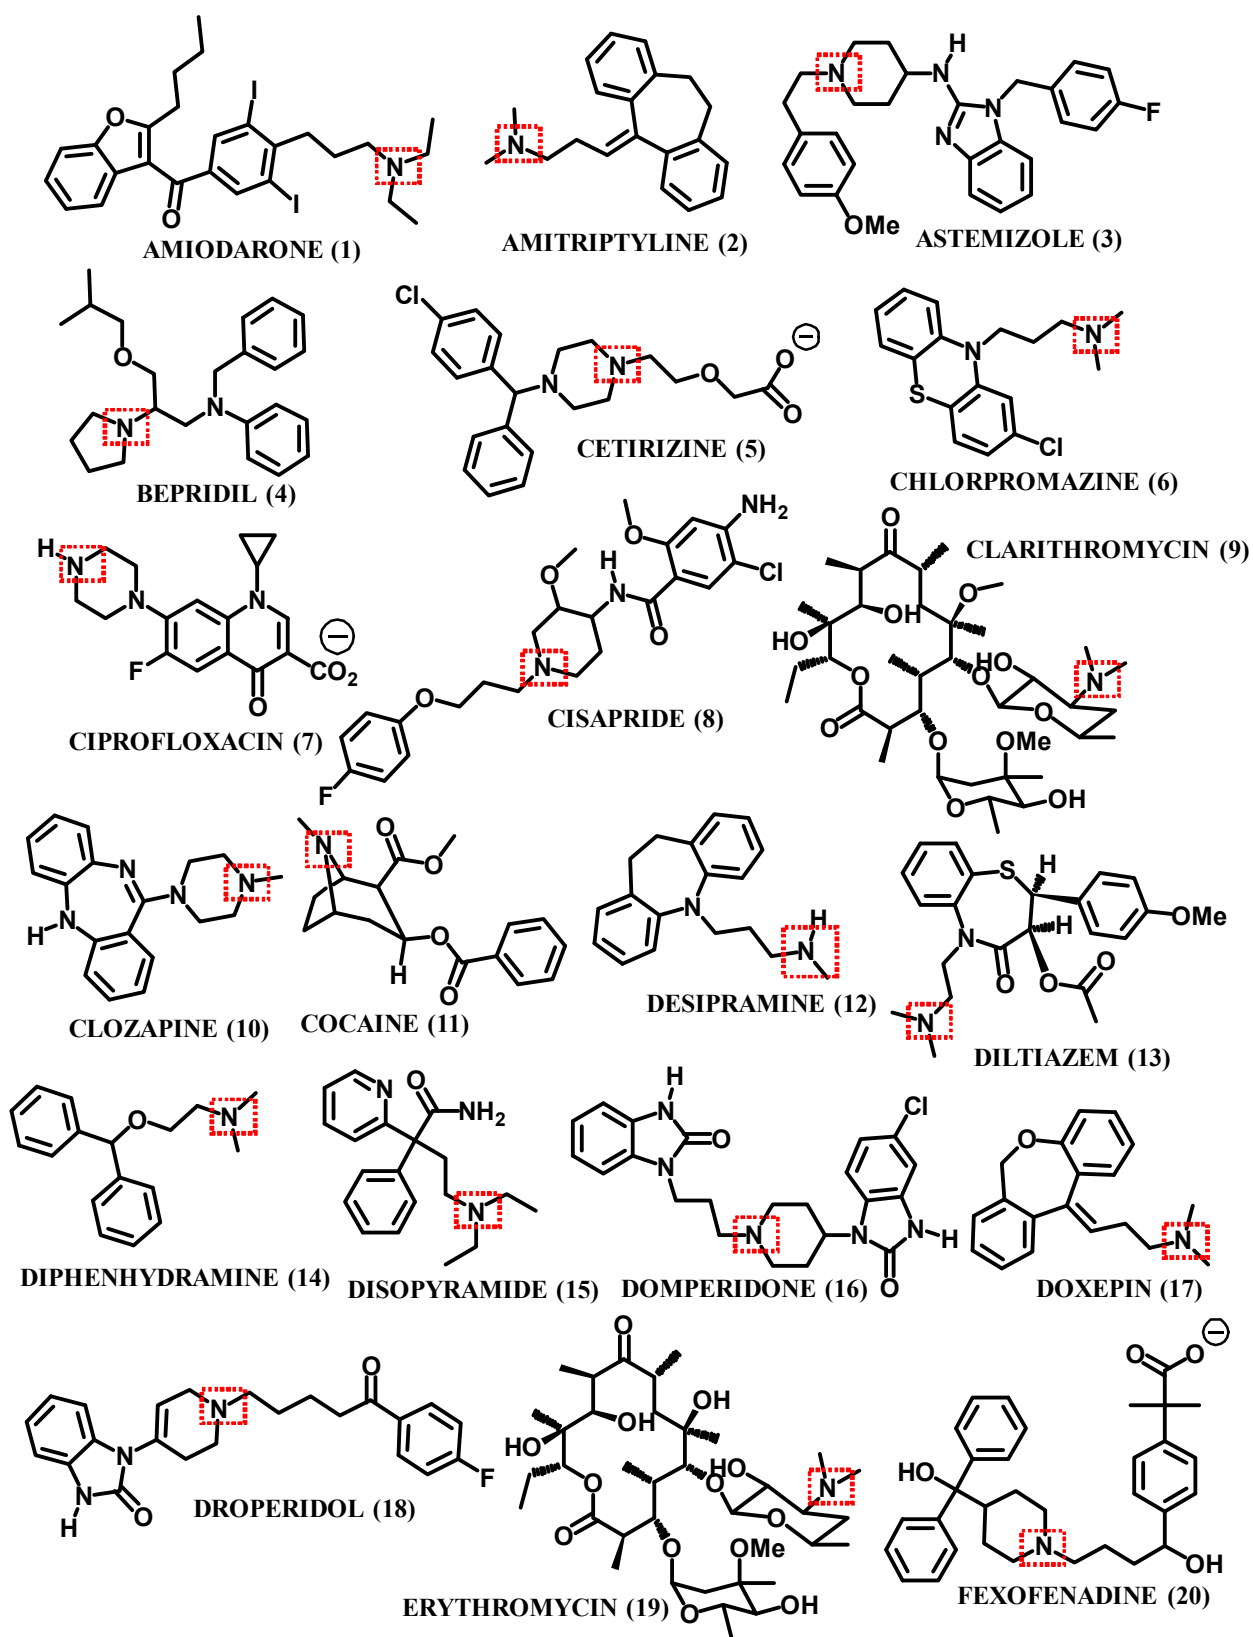

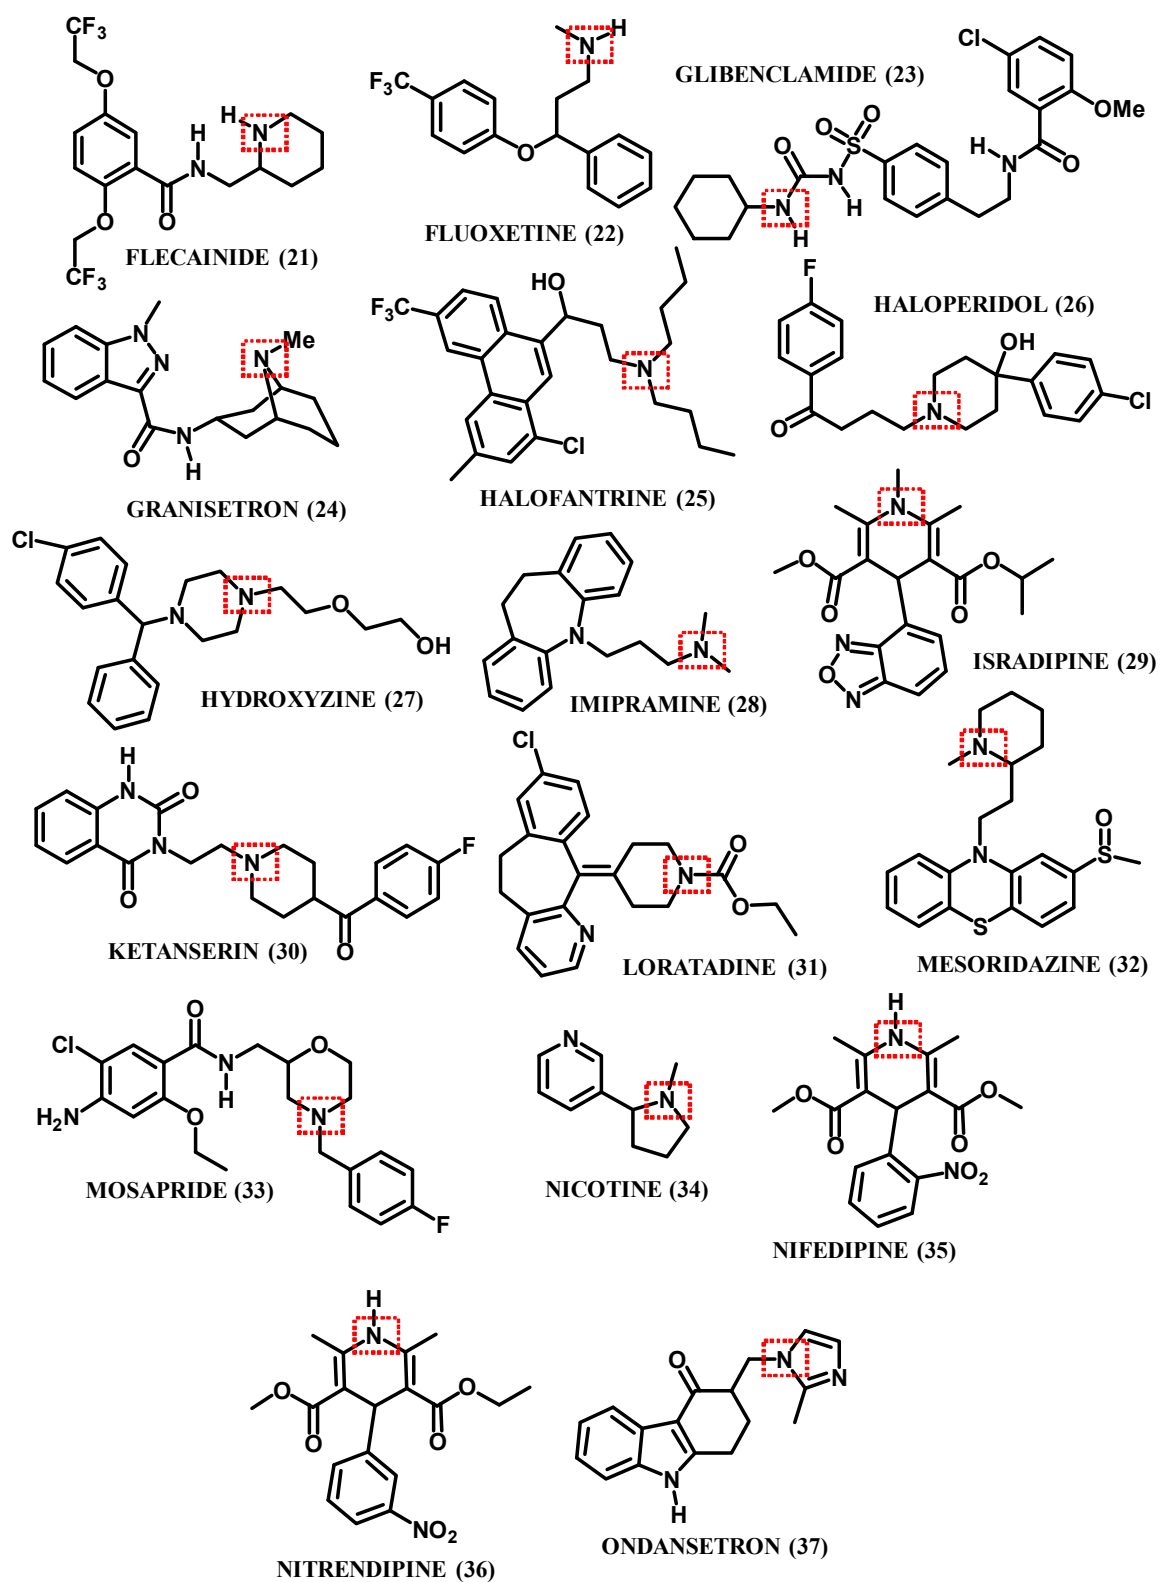

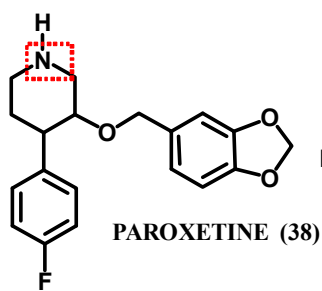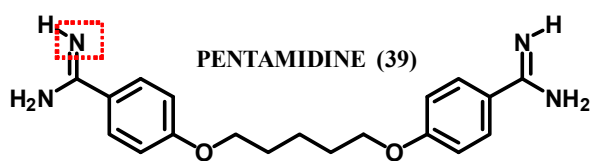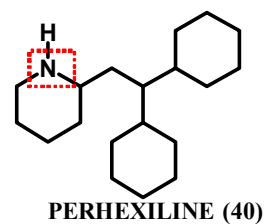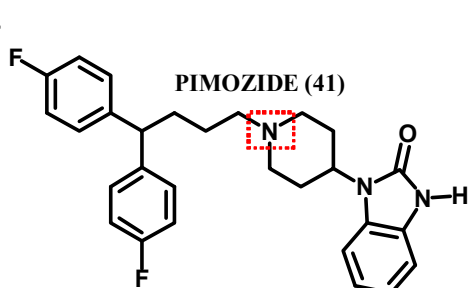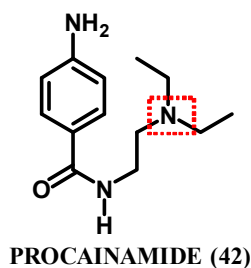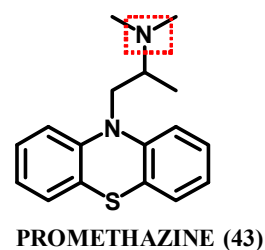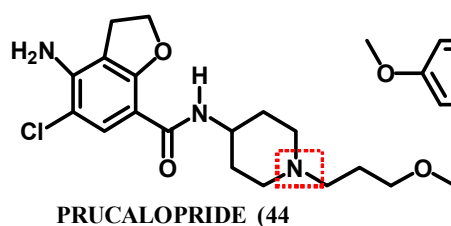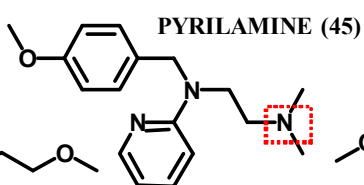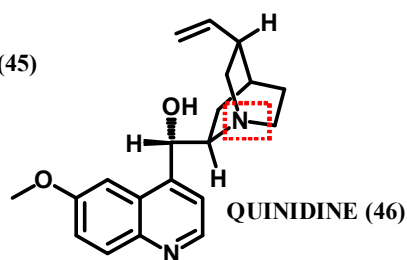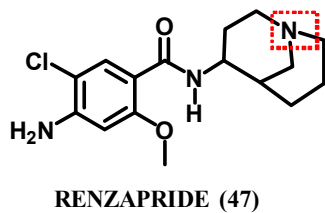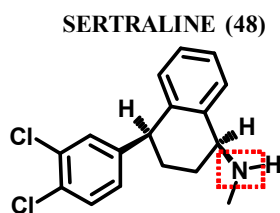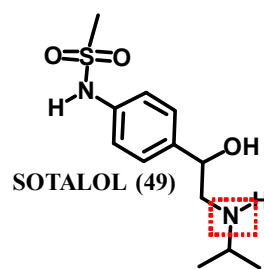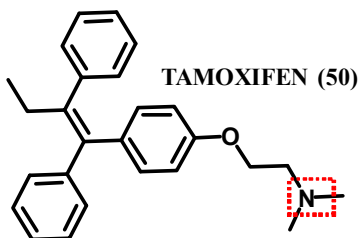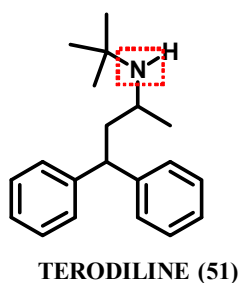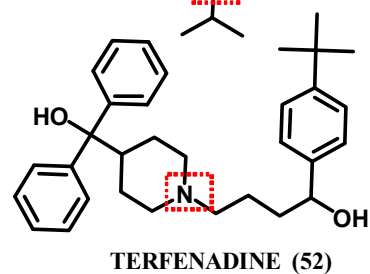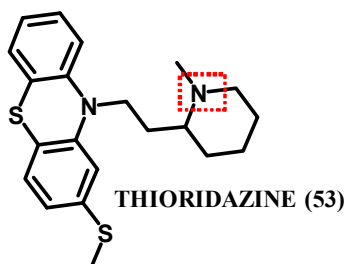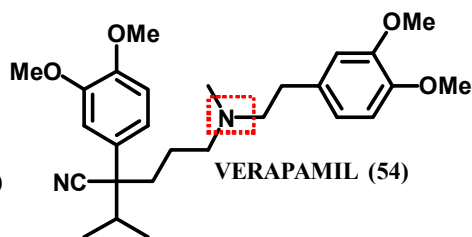

**Figure S2**

Compounds from **Table 1** HF/321G NBO after Q1-Q4;  $IC_{50}$  vs NBO

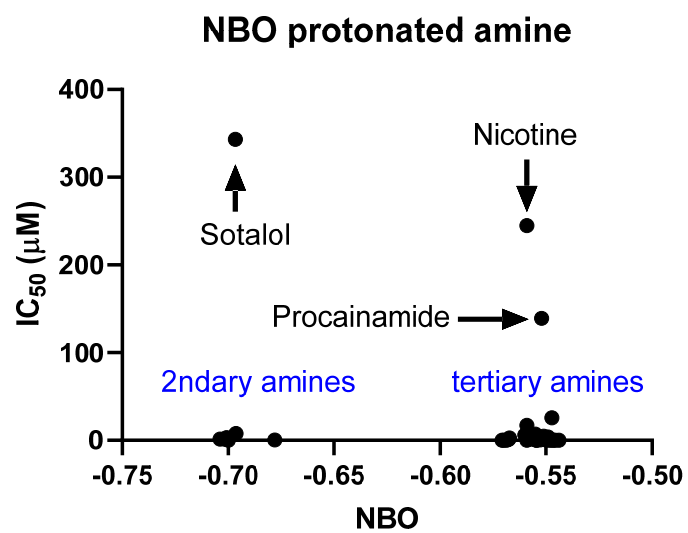

**Figure S3**

Compounds from **Table 1** HF/321G NBO after nicotine, sotalol, and procainamide removed; IC<sub>50</sub> vs NBO

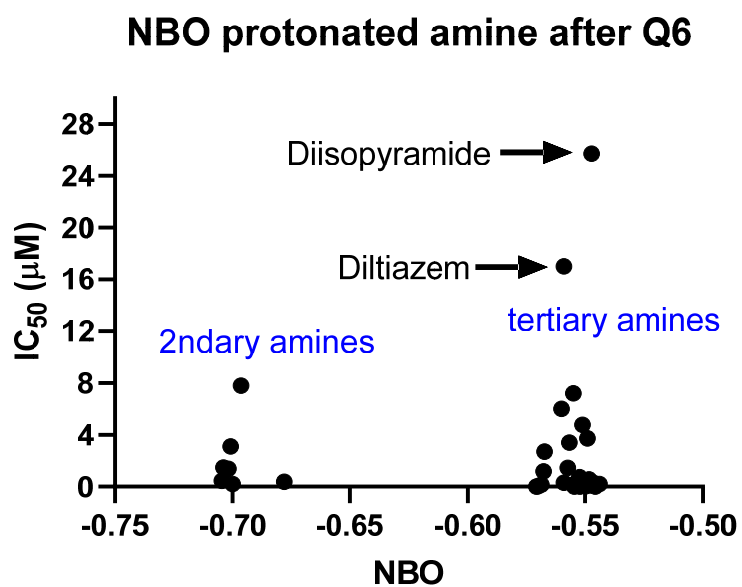



**Table S3** Summary of Q6 from learning set

| IC50 $\mu$ M | 2 Aromatic Rings  | N Alkyl                                                            |                            |           |
|--------------|-------------------|--------------------------------------------------------------------|----------------------------|-----------|
|              |                   | 2ndary amines;                                                     | distance from amine        | Direction |
| 0.21         | Sertraline        | Secondary; methyl-cyclohexyl (109 amu)                             | 2 and 4 BDS, Sep by 1 bond | Same      |
| 0.375        | Terodiline        | Secondary; tert-butyl-isobutyl (128 amu)                           | 3 and 3 BDS, Sep by 1 bond | Same      |
| 0.45         | Paroxetine        | Secondary; Piperidine-3-O-ethyl (100 amu)                          | 3 and 4 BDS, Sep by 4 BDS  | Same      |
| 1.39         | Desipramine       | Secondary; Methyl-propyl (87 amu)                                  | 4 and 4 BDS, Sep by 1 bond | Same      |
| 3.1          | Fluoxetine        | Secondary; Methyl-4-O-butyl (88 amu)                               | 3 and 4 BDS, Sep by 2 BDS  | Same      |
| IC50 $\mu$ M | 2 Aromatic Rings  | Tertiary Amines                                                    |                            |           |
|              |                   |                                                                    | distance from amine        | Direction |
| 0.0067       | Cisapride         | Tertiary; 4-O-butyl, pip-3-methoxy (172 amu)                       | 4 and 5 BDS, Sep by 10 BDS | Opposite  |
| 0.0268       | Haloperidol       | Tertiary; dibutyl-3-OH-propyl (142 amu)                            | 3 and 4 BDS, Sep by 8 BDS  | Opposite  |
| 0.033        | Thioridazine      | Tertiary;methyl-2-ethyl-pip (141 amu)                              | 4 and 4, Sep 1 BDS         | Same      |
| 0.18         | Hydroxyzine       | Tertiary; -CH-pip-Et-O-EtOH (141 amu)                              | 4 and 4 BDS, Sep by 1 bond | Same      |
| 0.21         | Verapamil         | Tertiary; Me-Et-4-CN-5-me-hexane (111 amu)                         | 2 and 4 BDS, Sep by 7 BDS  | Same      |
| 0.32         | Quinidine         | Tertiary; bicyclo2:2:2 -CH-2-allyl (155 amu)                       | 2 and 3 BDS, Sep by 0 BDS  | Same      |
| 0.55         | Bepridil          | Tertiary; 3-O-5-Me-hexyl;3-N-butyl (128 amu)                       | 3 and 4 BDS, Sep by 2 BDS  | Opposite  |
| 2.7          | Diphenylhydramine | Tertiary; diMe-3-O-butyl (102 amu)                                 | 4 & 4 BDS, Sep by1 BDS     | Same      |
| 3.4          | Imipramine        | Tertiary; dimethyl-propyl (102 amu)                                | 4 and 4 BDS, Sep by 1 bond | Opposite  |
| 3.7          | Granisetron       | Tertiary; Methyl-bicyclo-3:3- (127 amu)                            | 5 and 6 BDS, Sep by 0 BDS  | Same      |
| 4.8          | Mosapride         | Tertiary; -CH <sub>2</sub> -morp-3-CH <sub>2</sub> NHCO- (114 amu) | 1 and 5 BDS, Sep by 7 BDS  | Opposite  |
| 6.0          | Pyrilamine        | Tertiary; Dimethyl-3-N-butyl (86 amu)                              | 3 and 4 BDS, Sep by 2 BDS  | Same      |
| 17           | Diltiazem         | Tertiary; Dimethyl-ethyl (87 amu)                                  | 3 and 6 BDS, Sep by 2 BDS  | Same      |
| 25.7         | Di-isopyramide    | Tertiary; DiEt-propyl (111 amu)                                    | 3 & 3 BDS, Sep by 1 BDS    | Same      |

| IC50 $\mu$ M | 3 aromatic rings | N Alkyl | atom distance from amine | Direction |
|--------------|------------------|---------|--------------------------|-----------|
|--------------|------------------|---------|--------------------------|-----------|

|       |                |                                         |                                 |          |
|-------|----------------|-----------------------------------------|---------------------------------|----------|
| 0.032 | Droperidol     | Tert; 5-oxopent-2-Et-cyHex (138 amu)    | 3,4 and 5 BDS, Sep 9 BDS        | Opposite |
| 0.117 | Amiodarone     | Tertiary; diethylpropyl (115 amu)       | 3, 8 and 9 BDS, Sep 1 and 0 BDS | Same     |
| 0.20  | Halofantrine   | Tertiary; dibut-3-OH-prop (187 amu)     | 3,4, and 5 BDS, Sep 0 BDS       | Same     |
| 0.213 | Terfenadine    | Tert; 4-OH-but,4CHOH)pip (185 amu)      | 4,4 and 4 BDS, Sep 9 and 9 BDS  | Opposite |
| 0.32  | Clozapine      | Tertiary; Me-4-R-piperazine (100 amu)   | 3,4, and 5 BDS, Sep 0 BDS       | Same     |
| 0.32  | Mesoridazine   | Tertiary; Me-2-Et-piperidine (127 amu)  | 3,4, and 4 BDS, Sep 0 BDS       | Same     |
| 0.38  | Ketanserin     | Tertiary; 1-Et-4-R-piperidine (112 amu) | 2,3, and 4 BDS, Sep 7 BDS       | Opposite |
| 0.73  | Promethazine   | Tertiary; dimethyl-2-propyl (87 amu)    | 2,3 and 3 BDS, Sep 0 BDS        | Same     |
| 1.20  | Tamoxifen      | Tertiary; diMe-3-O-propyl (89 amu)      | 3, 8 and 9 BDS, Sep 1 and 2 BDS | Same     |
| 1.47  | Chlorpromazine | Tertiary; dimethylpropyl (87 amu)       | 3, 4 and 4 BDS, Sep 0 BDS       | Same     |

| IC50 $\mu$ M | Four aromatic rings | N Alkyl                              | atom distance from amine           | Direction |
|--------------|---------------------|--------------------------------------|------------------------------------|-----------|
| 0.001        | Astemizole          | Tertiary; Et-4R-piperidine (112 amu) | 2, 4, 6 and 7, Sep by 7 and 10 BDS | Opposite  |
| 0.018        | Pimozide            | Tertiary; Bu-4R-piperazine (139 amu) | 4,4 and 3,4 Sep by 8 BDS           | Opposite  |
| 0.16         | Domperidone         | Tert; Propyl-4R-piperazine (126 amu) | 3,4 and 3,4 Sep by 7 BDS           | Opposite  |

**Figure S4**

Terfenadine versus fexofenadine

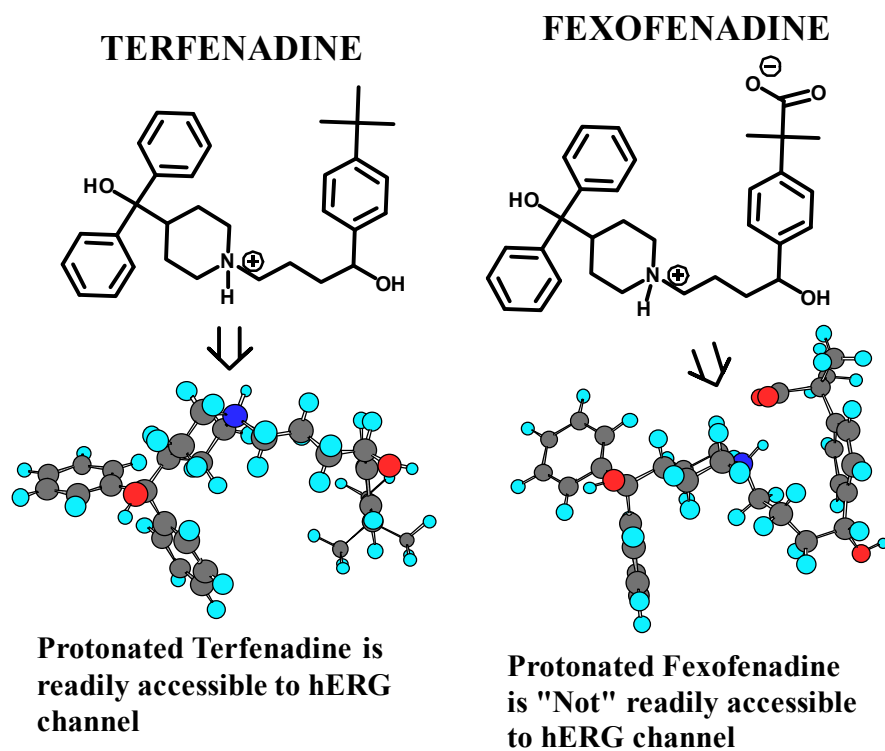

**Figure S5**

Cisapride, mosapride, prucalopride and renzapride

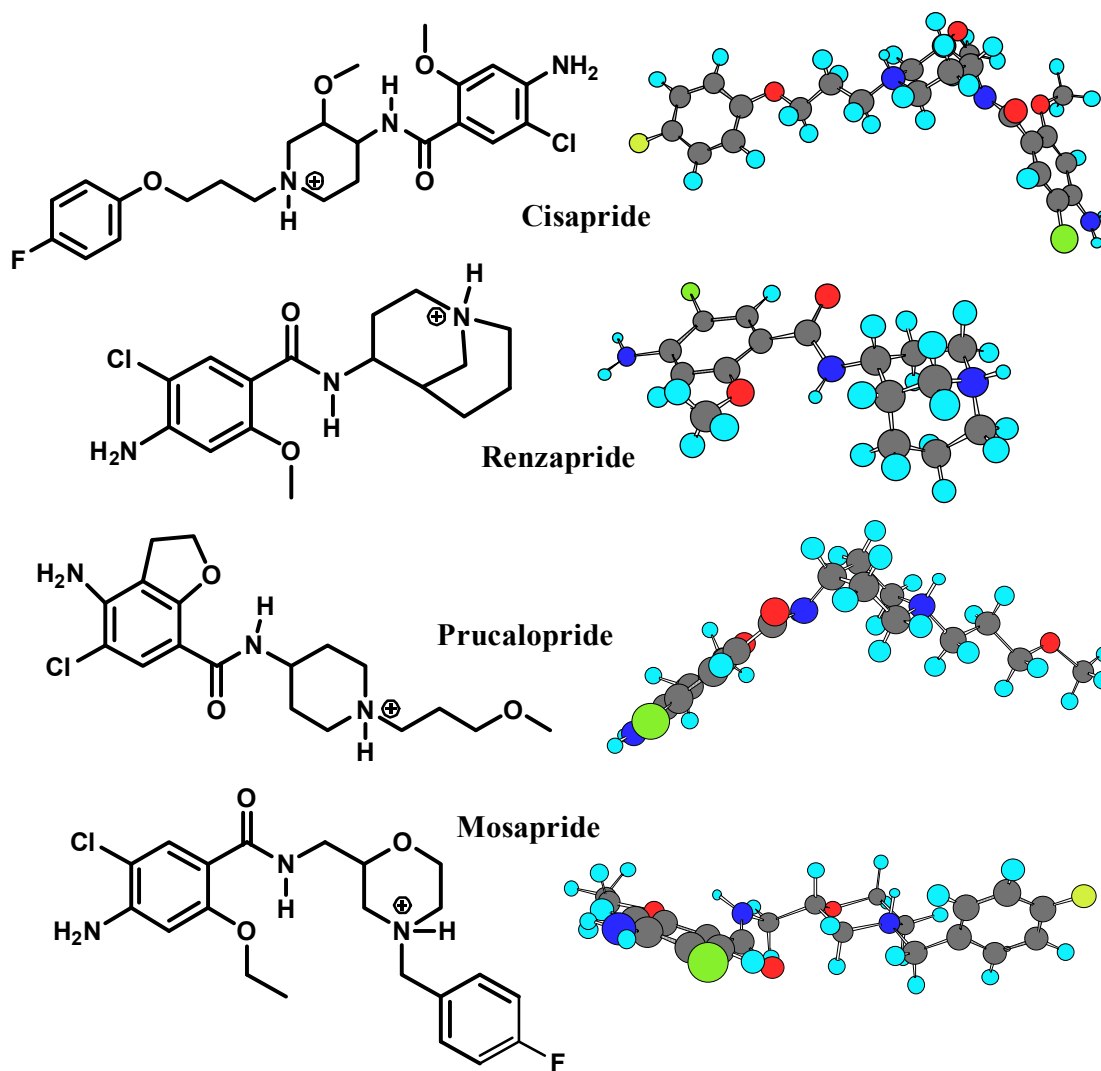

**Figure S6** Additional hERG compounds; Set Two

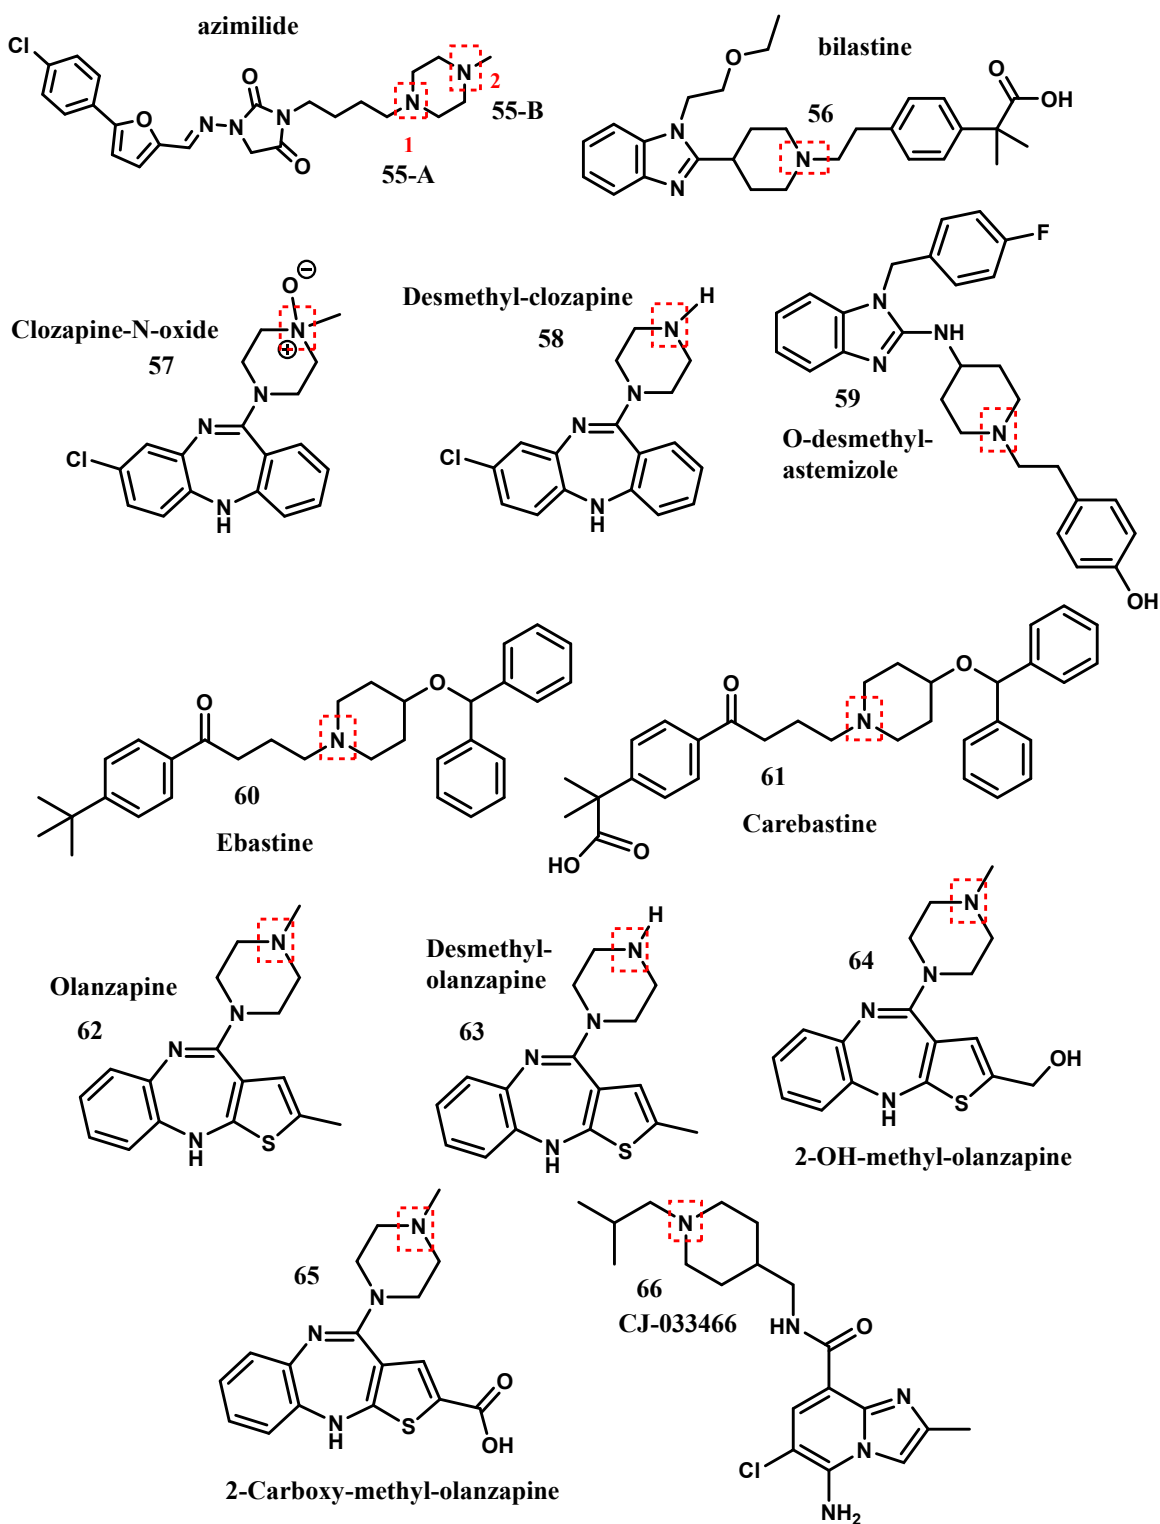

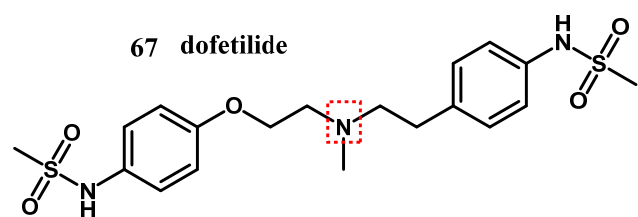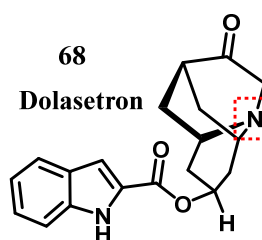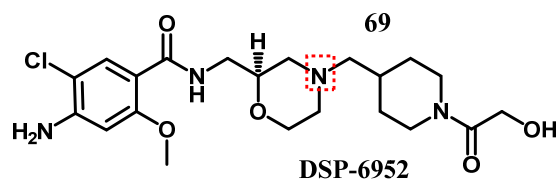

Chlorphenamine

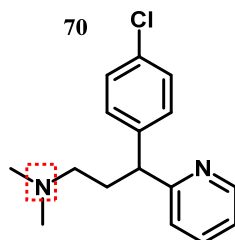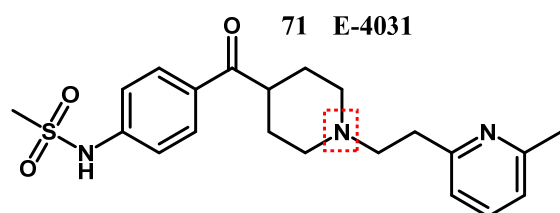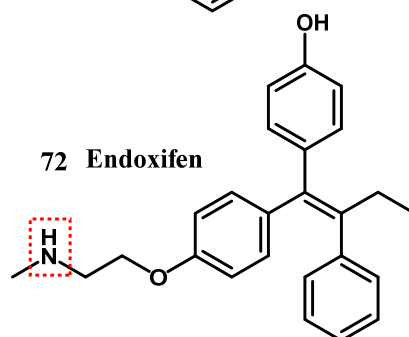

73 Gatifloxacin

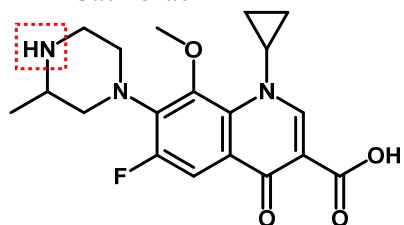

74 Lidoflazine

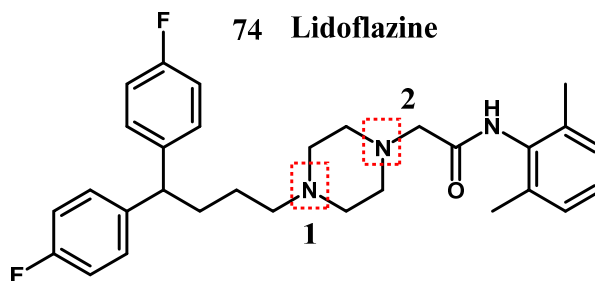

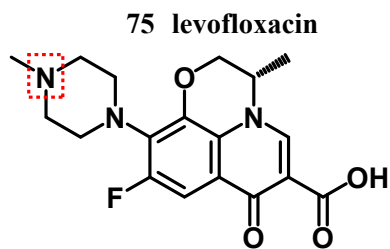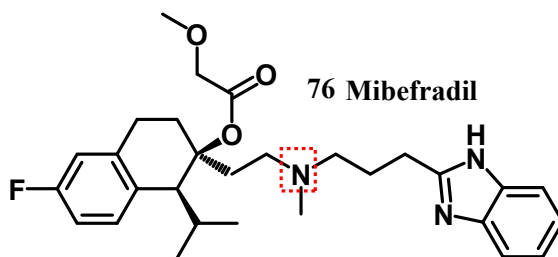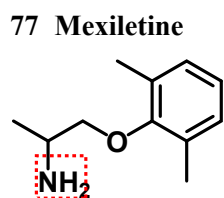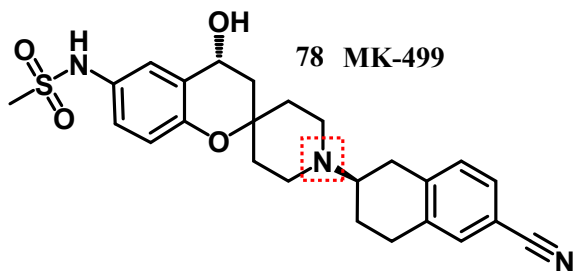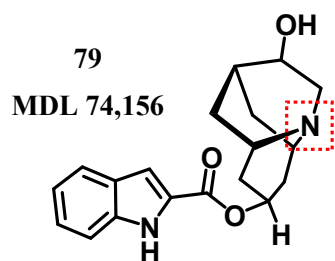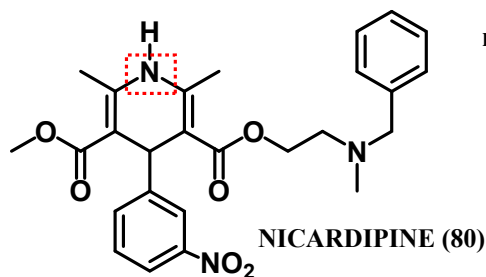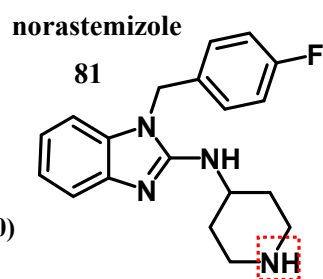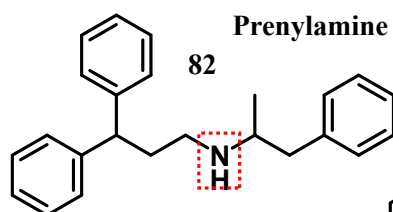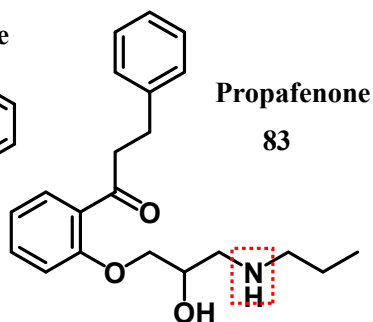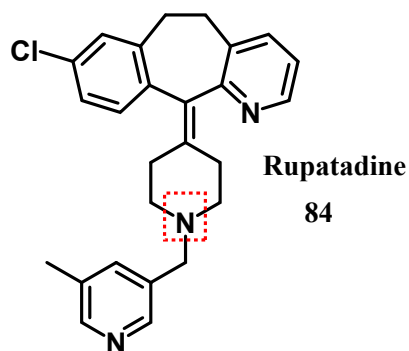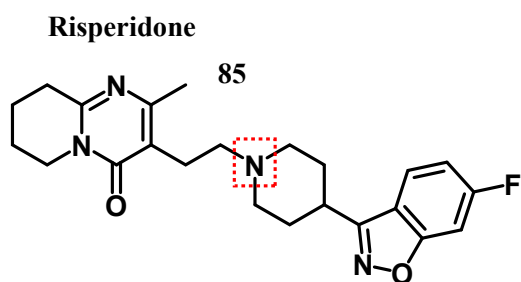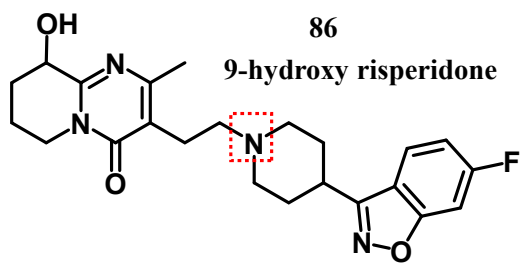

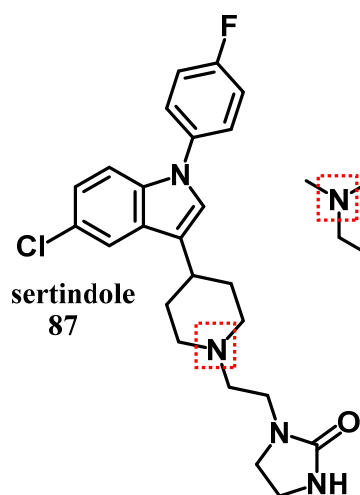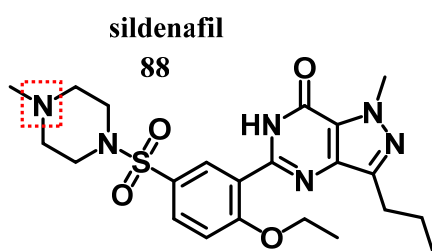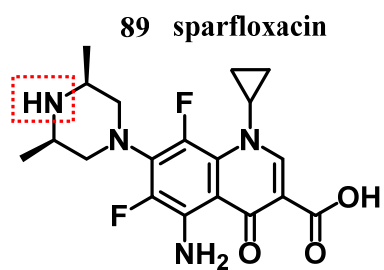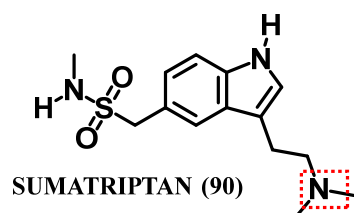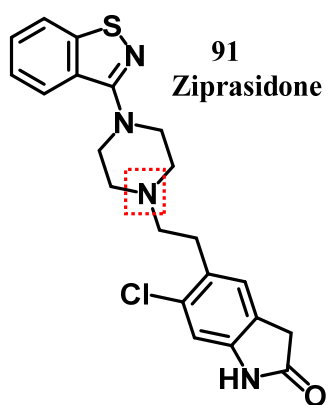



**Scheme S1** hERG Channel prediction flow-chart for compound set two

## hERG Channel Flow-chart

Q1: From the test set, which compounds do not contain an amine?

N/A

Q2: From the amines, is the protonated nitrogen NBO < -0.45?

Yes ( $IC_{50} > 7 \mu M$ )      No (go to Q3)

Clozapine-*N*-oxide

Q3: Is the protonated nitrogen Mulliken > -0.90?

Yes ( $IC_{50} > 10 \mu M$ )      No (go to Q4)

Nicardipine

Q4: Is there a carboxylic acid in the molecule?

Yes ( $IC_{50} > 4 \mu M$ )      No (go to Q5)

Bilastine

Carebastine

2-Carboxy-methyl-olanzapine

Levofloxacin

Sparfloxacin

Q5: Does the protonated N experience a field effect (shielding) ?

Yes ( $IC_{50} > 4 \mu M$ )      No (go to Q6)

Rupatadine

Q6: Does the drug contain zero, one, two, three or more aromatic rings?

| One              | Two                                | Three                              | Four                      |
|------------------|------------------------------------|------------------------------------|---------------------------|
| DSP-6952 (0.271) | Azimilide (0.58)                   | Clozapine (0.32)                   | O-DesMe astemizole (0.01) |
| Mexiletine (>10) | CJ-033466 (2.6)                    | Desmethyl clozapine (4.49)         |                           |
|                  | Chlorphenamine (13)                | Desmethyl-olanzapine (14.2)        |                           |
|                  | Dofetilide (0.007)                 | Ebastine (0.30)                    |                           |
|                  | Dolasetron (5.95)                  | Endoxifen (1.6)                    |                           |
|                  | E-4031 (0.0268)                    | 2-OH-methyl-olanzapine (0.23)      |                           |
|                  | MDL 74,156 (12.1)                  | 9-OH-Risperidone (1.3)             |                           |
|                  | MK-499 (0.032)                     | Lidoflazine (0.037)                |                           |
|                  | Propafenone (2.0)                  | Mibefradil (1.43)                  |                           |
|                  | <i>Ave = 4.5 <math>\mu</math>M</i> | Norastemizole (0.028)              |                           |
|                  |                                    | Olanzapine (0.231)                 |                           |
|                  |                                    | Prenylamine (0.59)                 |                           |
|                  |                                    | Risperidone (0.14)                 |                           |
|                  |                                    | Sertindole (0.024)                 |                           |
|                  |                                    | Sildenafil (3.3)                   |                           |
|                  |                                    | Ziprasidone (0.15)                 |                           |
|                  |                                    | <i>Ave = 1.8 <math>\mu</math>M</i> |                           |

Q7: For drugs with more than one aromatic ring, are they going in the same direction or are they going in different directions? What is the number of atoms away from the protonated amine? See **Table S4**

**Table S4** Summary of Q6 for compound test set

| IC50 $\mu$ M | Two Aromatic   |                                                       | Distance from amine         |  |  |
|--------------|----------------|-------------------------------------------------------|-----------------------------|--|--|
|              | Rings          | N, Alkyl                                              | Direction                   |  |  |
| 0.007        | Dofetilide     | Tertiary; Me-Et-2-ethoxy (102 amu)                    | 2 and 3 BDS, Sep by 6 BDS   |  |  |
| 0.0268       | E-4031         | Tertiary; Et-4-CO-piperazine (111 amu)                | 2 and 4 BDS, Sep by 7 BDS   |  |  |
| 0.032        | MK-499         | Tert; 4-Disub-piperaine-cyclohex (138 amu)            | 2 and 4 BDS, Sep by 7 BDS   |  |  |
| 0.58         | Azimilide      | Tertiary; ethyl-4-CO-piperazine (152 amu)             | 11 and 14 BDS, Sep by 0 BDS |  |  |
| 2.00         | Propafenone    | Secondary; propyl-2-OH-3O-propyl (133 amu)            | 4 and 9 BDS, Sep by 3 BDS   |  |  |
| 2.60         | CJ-033466      | Tert;N-isopro-piper-CH <sub>2</sub> NH-CO-R (155 amu) | 6 and 7 BDS, Sep by 0 BDS   |  |  |
| Est 3-4      | Sumatriptan    | Tertiary; dimethyl-ethyl (73 amu)                     | 2 and 3 BDS, Sep by 0 BDS   |  |  |
| 5.95         | Dolasetron     | Tertiary; adamantanone (165 amu)                      | 4 and 6 BDS, Sep by 0 BDS   |  |  |
| 12.1         | MDL 74,156     | Tertiary; -2-OH-adamantane (155 amu)                  | 4 and 6 BDS, Sep by 1 bond  |  |  |
| 13.0         | Chlorphenamine | Tertiary; dimethyl-propyl (86 amu)                    | 3 and 3 BDS, Sep by 1 BDS   |  |  |

| IC50 $\mu$ M | 3 Aromatic Rings     | N Alkyl                                                   | Distance from amine             | Direction |
|--------------|----------------------|-----------------------------------------------------------|---------------------------------|-----------|
| 0.02         | Sertindole           | Tert; 2-cyclopentyl-4-piperidine (126 amu)                | 3, 4 and 6 BDS, Sep 0 BDS       | Same      |
| 0.028        | Norastemizole        | Secondary; 4-NHR-piperazine (100 amu)                     | 4, 6, and 7 BDS, Sep 1          | Same      |
| 0.037        | Lidoflazine          | Tert; 4-N-R-piperidine-1-butyl (154 amu)                  | 4,4 and 6 BDS, Sep 11 BDS       | Opposite  |
| 0.14         | Risperidone          | Tertiary; 2-R-Et-4-R'-piperidine (112 amu)                | 2,3,4 BDS, Sep 6                | Opposite  |
| 0.15         | Ziprasidone          | Tertiary; 2-R-Et-4-R'-piperazine (112 amu)                | 2, 3, and 4 BDS, Sep 6 BDS      | Opposite  |
| 0.23         | 2-OH-Me-olanzapine   | Tertiary; Me-4-R-piperazine (100 amu)                     | 3, 4 and 5 BDS, Sep 0,1 BDS     | Same      |
| 0.231        | Olanzapine           | Tertiary; Me-4-R-piperazine (100 amu)                     | 3, 4, and 5 BDS, Sep 0 BDS      | Same      |
| 0.30         | Ebastine             | Tert; 4-oxo-but-(4-OCHRR')-pip (142 amu)                  | 4, 5, and 5 BDS, Sep 10 BDS     | Opposite  |
| 0.59         | Prenylamine          | 2ndary; 3,3-RR'-prop-isoprop-2-R (99 amu)                 | 2, 3, and 3 BDS, Sep 6 BDS      | Opposite  |
| 1.3          | 9-OH-Me-risperidone  | Tert; 2-R-Et-4-R'-piperidine (112 amu)                    | 2, 3 and 4 BDS, Sep 6 BDS       | Opposite  |
| 1.43         | Mibefradil           | Tertiary; methyl-ethyl-3-R-propyl (112 amu)               | 3, 4 and 5 BDS, Sep 8 BDS       | Opposite  |
| 1.6          | Endoxifen            | Secondary; methyl-CH <sub>2</sub> OR (75 amu)             | 3, 8 and 9 BDS, Sep 1 and 2 BDS | Same      |
| 3.3          | Sildenafil           | Tertiary; methyl-4-piperazine-R (100 amu)                 | 4, 7 and 9 BDS, Sep 0 BDS       | Same      |
| 4.49         | Desmethyl-clozapine  | Secondary; piperazine (86 amu)                            | 3, 4 and 5 BDS, Sep 0 BDS       | Same      |
| 8.1          | Rupatadine           | Tertiary; 4-R-(N-CH <sub>2</sub> -R')-piperidine (97 amu) | 1, and 4,4 BDS, Sep 6 BDS       | Opposite  |
| 14.2         | Desmethyl-olanzapine | Secondary; 4-R-piperidine (86 amu)                        | 3, 4, and 5 BDS, Sep 0 BDS      | Same      |

| IC50 $\mu$ M | 4 aromatic rings   | N Alkyl   | atom distance from amine             | Direction                          |
|--------------|--------------------|-----------|--------------------------------------|------------------------------------|
| 0.01         | O-DesMe-Astemizole | Tertiary; | 2-Et-R-(4-NHR'-piperazine) (127 amu) | 2, 4, 6 and 7, Sep by 7 and 10 BDS |
